# Supplementary material for: N-cadherin can structurally substitute for E-cadherin during intestinal development but leads to polyp formation
Source: Oxford University Press journal article supplement (doi:10.1242/dev.048488), 2010-06-09
Supplement: dev048488tables1.pdf [file dev048488tables1.pdf]

**Table S1. Primers used for qRT-PCR with Universal Probe Library (UPL, Roche)**

| Gene              | Forward and reverse primers                      | Mouse UPL probe no. |
|-------------------|--------------------------------------------------|---------------------|
| <i>Bmp7</i>       | TGACAACGAGACCTTCCAGA<br>CCTCAGAAGCCCAGATGGT      | 1                   |
| <i>Cd44</i>       | ACTCAAGTGCGAACCAGGAC<br>GCCAAGATGATGAGCCATTC     | 93                  |
| <i>c-Myc</i>      | GGAGGGAATTTTGTCTATTTGG<br>CATCGTCGTGGCTGTCTG     | 34                  |
| <i>cyclin D1</i>  | GAGATTGTGCCATCCATGC<br>CTCCTCTTCGCACTTCTGCT      | 67                  |
| <i>Id2</i>        | ACAGAACCAGGGCTCCAG<br>AGCTCAGAAGGGAATTCAGATG     | 89                  |
| <i>Id3</i>        | GAGGAGCTTTTGCCACTGAC<br>GAGAGAGGGTCCCAGAGTCC     | 95                  |
| <i>L1cam</i>      | TGAACAACCAGGGCAAGG<br>CTTCAAGTTCAGGGCTCACC       | 45                  |
| <i>Smad6</i>      | GTTGCAACCCCTACCACTTC<br>GGAGGAGACAGCCGAGAATA     | 70                  |
| <i>Smad7</i>      | ACCCCATCACCTTAGTCG<br>GAAAATCCATTGGGTATCTGGA     | 63                  |
| 14-3-3 $\zeta$    | TTACTTGGCCGAGGTTGCT<br>TGCTGTGACTGGTCCACAAT      | 9                   |
| R-spondin 1       | CGACATGAACAAATGCATCA<br>CTCCTGACACTTGGTGCAGA     | 5                   |
| <i>Pten</i>       | AGGCACAAGAGGCCCTAGAT<br>CTGACTGGGAATTGTGACTCC    | 60                  |
| <i>Bambi</i>      | CGCCACTCCAGCTACTTCTT<br>CACAGTAGCATCTGATCTCTCCTT | 71                  |
| <i>gremlin 2</i>  | AGGCTTCCATCTCGTCATTG<br>CCGTGTTTCAGCTACCTTTACC   | 76                  |
| <i>Bmpr1a</i>     | CTCATTCCATGGCTGTCTG<br>CGACCCCTGCTTGAGATACT      | 78                  |
| <i>Bmpr1b</i>     | AACCCGGCCATAAGTGAAG<br>GGGTGGGGGCTGTACTCT        | 88                  |
| <i>Bmpr2</i>      | GAGCCCTCCCTTGACCTG<br>GTATCGACCCCGTCCAATC        | 67                  |
| <i>calponin 2</i> | GGAAACATGACACAGGTGCAA<br>CAATGTCCACACCACTCTGC    | 20                  |
| <i>calponin 3</i> | CCGCCGAAGTTAAGAACAAG<br>GGCCTGTCACCTCTTCTATCC    | 40                  |
| $\beta$ -catenin  | GCTGACCAGTTCCTCTTCA<br>CACCAATGTCCAGTCCAAGA      | 21                  |
